# Supplementary material for: NT157 exerts antineoplastic activity by targeting JNK and AXL signaling in lung cancer cells
Source: PubMed Central journal article supplement (PMC9556623; doi:10.1038/s41598-022-21419-6), 2022-10-12
Supplement: 41598_2022_21419_MOESM1_ESM.pdf [file 41598_2022_21419_MOESM1_ESM.pdf]

## **NT157 exerts antineoplastic activity by targeting JNK and AXL signaling in lung cancer cells**

Lívia Bassani Lins de Miranda<sup>1</sup>, Keli Lima<sup>1,2</sup>, Juan Luiz Coelho-Silva<sup>3</sup>, Fabiola Traina<sup>3</sup>, Susumu S. Kobayashi<sup>4,5,6</sup>, João Agostinho Machado-Neto<sup>1,\*</sup>

<sup>1</sup> Department of Pharmacology, Institute of Biomedical Sciences, University of São Paulo, São Paulo, Brazil

<sup>2</sup> Laboratory of Medical Investigation in Pathogenesis and Targeted Therapy in Onco-Immuno-Hematology (LIM-31), Department of Hematology, Hospital das Clínicas HCFMUSP, Faculdade de Medicina, University of São Paulo, São Paulo, Brazil

<sup>3</sup> Department of Medical Imaging, Hematology, and Oncology, Ribeirão Preto Medical School, University of São Paulo, Ribeirão Preto, Brazil

<sup>4</sup> Department of Medicine, Beth Israel Deaconess Medical Center and Harvard Medical School, 330 Brookline Avenue, E/CLS-407, Boston, MA 02215, USA

<sup>5</sup> Division of Translational Genomics, Exploratory Oncology Research and Clinical Trial Center, National Cancer Center, Kashiwa 277-8575, Japan

<sup>6</sup> Harvard Stem Cell Institute, Harvard Medical School, Boston, MA 02215, USA

### **List of supplementary material**

**Supplementary Table 1.** Primer sequences and concentrations.

**Supplementary Table 2.** List of antibodies for western blot.

**Supplementary Figure 1.** Whole gel images from Western blot analysis.

**Supplementary Figure 2.** Whole gel images from Western blot analysis.

**Supplementary Figure 3.** Whole gel images from Western blot analysis.

**Supplementary Figure 4.** Whole gel images from Western blot analysis.

**Supplementary Figure 5.** Downregulation of AXL induced by NT157 occurs at the mRNA level in lung cancer cells.

**Supplementary Figure 6.** NT157 displays antineoplastic activity in H1975, an EGFR-mutated cell line.

**Supplementary Table 1.** Primer sequences and concentrations.

| <b>Gene</b>   | <b>Sequence</b>                                           | <b>Concentration</b> |
|---------------|-----------------------------------------------------------|----------------------|
| <i>AXL</i>    | FW: GTGGGCAACCCAGGGAATATC<br>RV: GTACTGTCCCGTGTCTGGAAAG   | 300 nM               |
| <i>BBC3</i>   | FW: GACCTCAACGCACAGTACGAG<br>RV: AGGAGTCCCATGATGAGATTG    | 300 nM               |
| <i>BCL2</i>   | FW: ATGTGTGTGGAGAGCGTCAA<br>RV: ACAGTTCCACAAAGGCATCC      | 300 nM               |
| <i>CCND1</i>  | FW: CTCGGTGTCTACTTCAAATG<br>RV: AGCGGTCCAGGTAGTTCAT       | 300 nM               |
| <i>CDKN1A</i> | FW: TGTCACTGTCTTGTACCCTTGT<br>RV: GCCGGCGTTTGGAGTGGTAG    | 300 nM               |
| <i>CDKN1B</i> | FW: ACTCTGAGGACACGCATTTGGT<br>RV: TCTGTTCTGTTGGCTCTTTTGT  | 300 nM               |
| <i>ERG1</i>   | FW: CTTCAACCCTCAGGCGGACA<br>RV: GGAAAAGCGGCCAGTATAGGT     | 300 nM               |
| <i>FOS</i>    | FW: AGAATCCGAAGGGAAAGGAA<br>RV: CTTCTCCTTCAGCAGGTTGG      | 300 nM               |
| <i>JUN</i>    | FW: CAGGTGGCACAGCTTAAACA<br>RV: GTTTGCAACTGCTGCGTTAG      | 300 nM               |
| <i>MYB</i>    | FW: CTCCGCCTACAGCTCAACTCC<br>RV: TCCTTTATTCGCTTTTCCTTCTCA | 300 nM               |
| <i>MYC</i>    | FW: GCCCCTGGTGCTCCATGA<br>RV: TTCCACAGAAACAACATCGATT      | 300 nM               |
| <i>NFKB1</i>  | FW: GGCAGCACTACTTCTTGACC<br>RV: CAGCAAACATGGCAGGCTAT      | 300 nM               |
| <i>PTEN</i>   | FW: TCCCAGTCAGAGGCGCTATG<br>RV: CACAAACTGAGGATTGCAAG      | 300 nM               |
| <i>HPRT1</i>  | FW: GAACGTCTTGCTCGAGATGTGA<br>RV: TCCAGCAGGTCAGCAAAGAAT   | 150 nM               |
| <i>ACTB</i>   | FW: AGGCCAACCGCGAGAAG<br>RV: ACAGCCTGGATAGCAACGTACA       | 150 nM               |

**Supplementary Table 2.** List of antibodies for western blot.

| <b>Manufacturer</b>                        | <b>Target</b>                     | <b>Specie</b> | <b>Catalog</b> |
|--------------------------------------------|-----------------------------------|---------------|----------------|
| Cell Signaling Technology (MA, USA)        | p-IRS1 <sup>Ser636/639</sup>      | Rabbit        | #2388          |
|                                            | IRS1                              | Rabbit        | #3407          |
|                                            | IRS2                              | Rabbit        | #3089          |
|                                            | p-IGF1R <sup>Tyr1135</sup>        | Rabbit        | #3918          |
|                                            | IGF1R                             | Rabbit        | #3027          |
|                                            | p-STAT3 <sup>Tyr705</sup>         | Rabbit        | #9131          |
|                                            | STAT3                             | Rabbit        | #4904          |
|                                            | p-AXL <sup>Tyr702</sup>           | Rabbit        | #5724          |
|                                            | AXL                               | Rabbit        | #4566          |
|                                            | p-SAPK/JNK <sup>Thr183/185</sup>  | Rabbit        | #9251          |
|                                            | SAPK/JNK                          | Rabbit        | #9252          |
|                                            | p-p38 MAPK <sup>Thr180/182</sup>  | Rabbit        | #9211          |
|                                            | p38 MAPK                          | Rabbit        | #9212          |
|                                            | p-ERK1/2 <sup>Thr202/Tyr204</sup> | Rabbit        | #9101          |
|                                            | ERK1/2                            | Rabbit        | #9102          |
|                                            | p-AKT <sup>Ser473</sup>           | Rabbit        | #4060          |
|                                            | AKT                               | Rabbit        | #4685          |
|                                            | p-4EBP1 <sup>Thr70</sup>          | Rabbit        | #9455          |
|                                            | 4EBP1                             | Rabbit        | #9452          |
|                                            | p-c-JUN <sup>Ser63/73</sup>       | Rabbit        | #3270          |
| c-JUN                                      | Rabbit                            | #9165         |                |
| PARP1                                      | Rabbit                            | #9542         |                |
| α-tubulin                                  | Rabbit                            | #2144         |                |
| Santa Cruz Biotechnology (Santa Cruz, USA) | γH2AX                             | Mouse         | sc-517348      |

H1299 cells

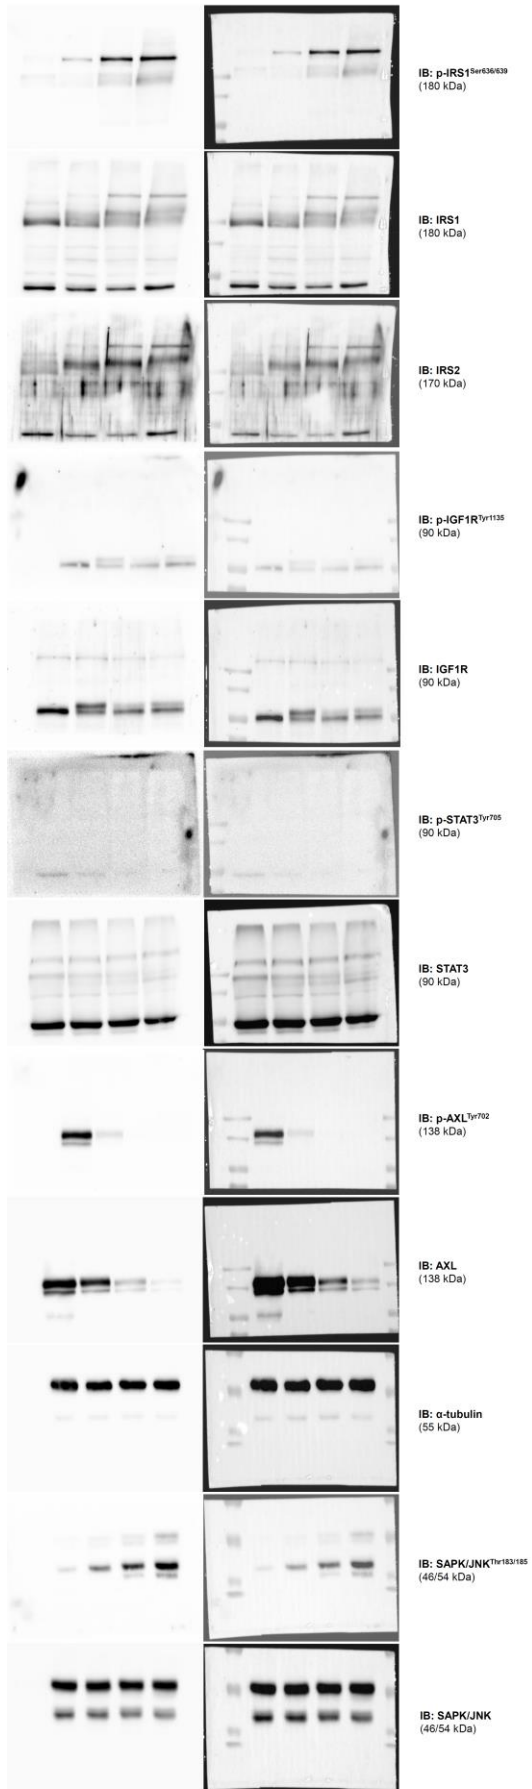

H1299 cells

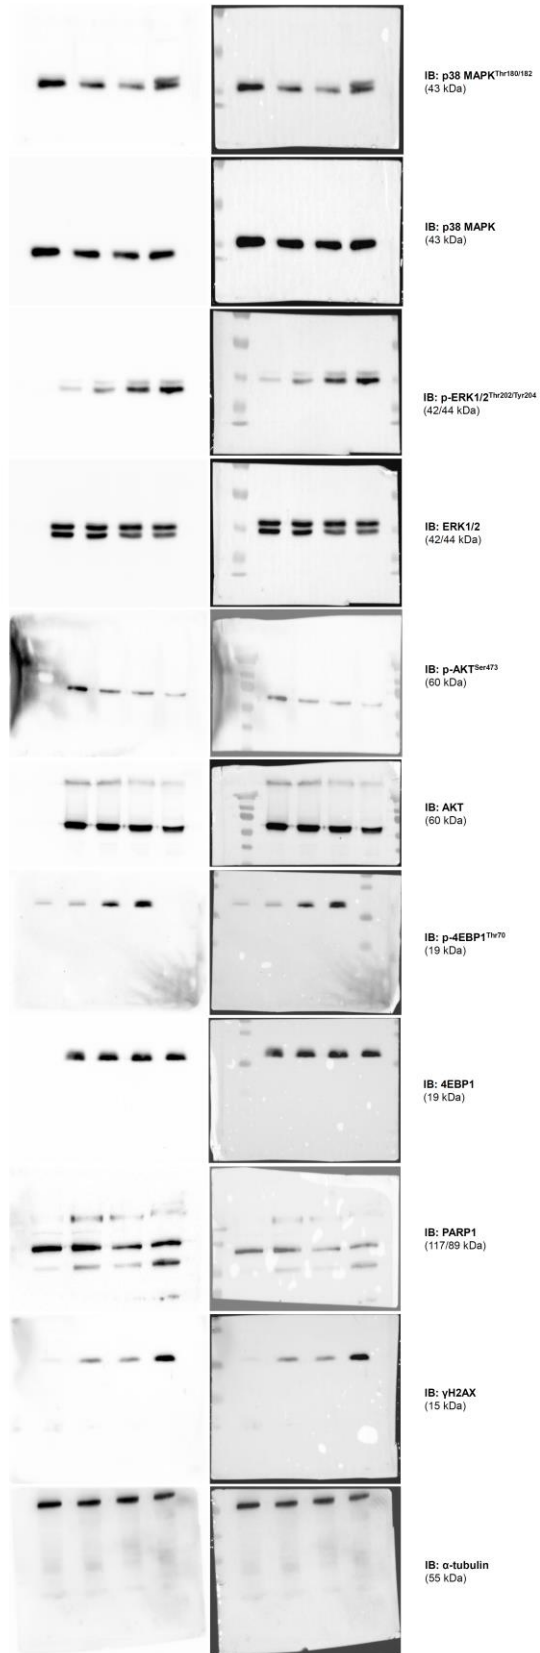

H460 cells

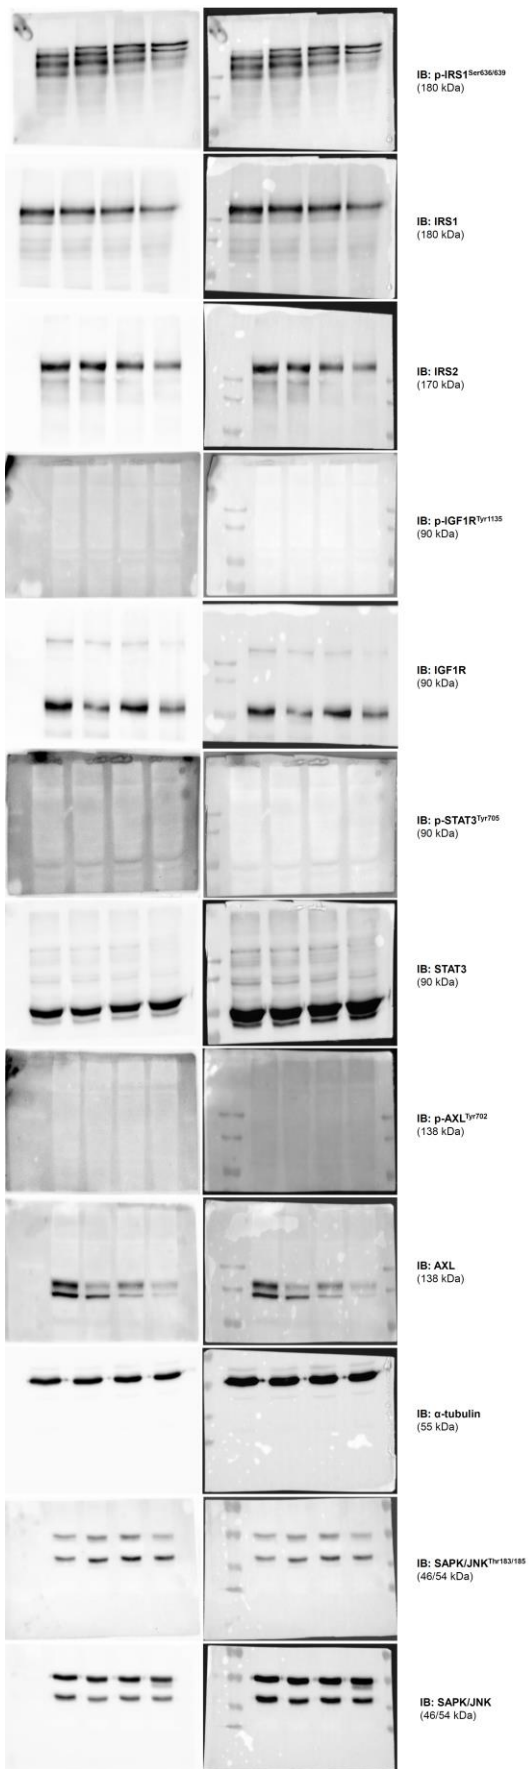

H460 cells

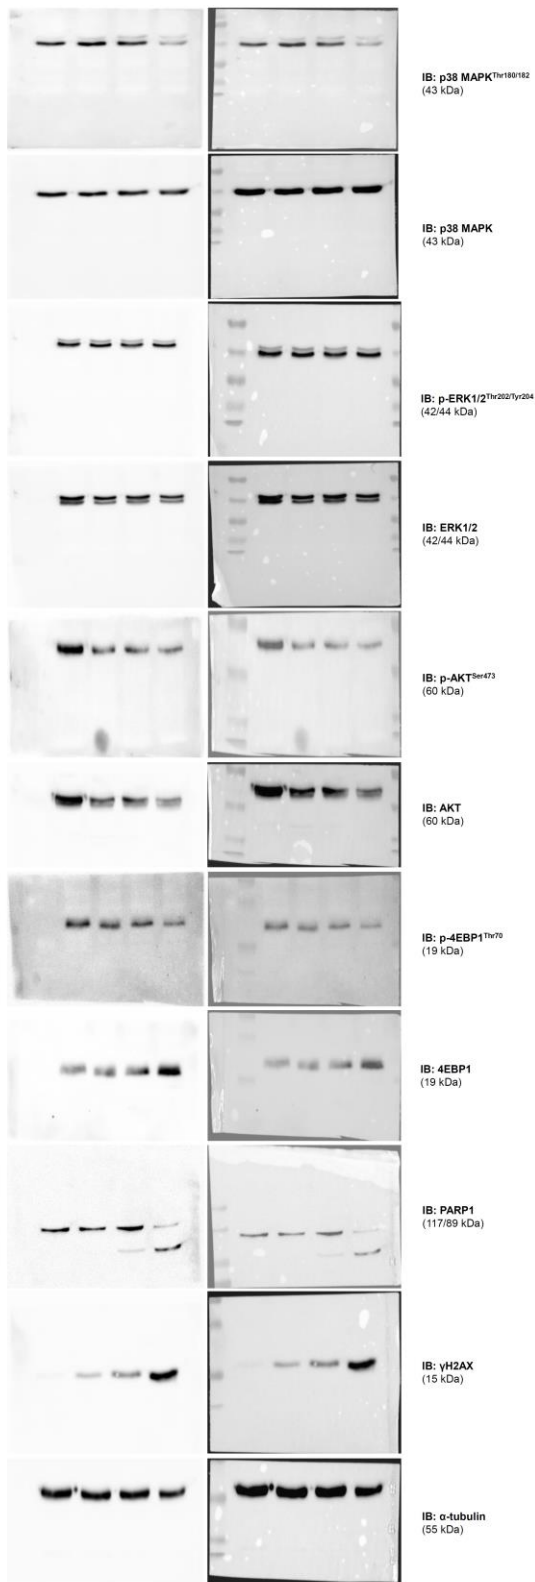

H1299 cells

H460 cells

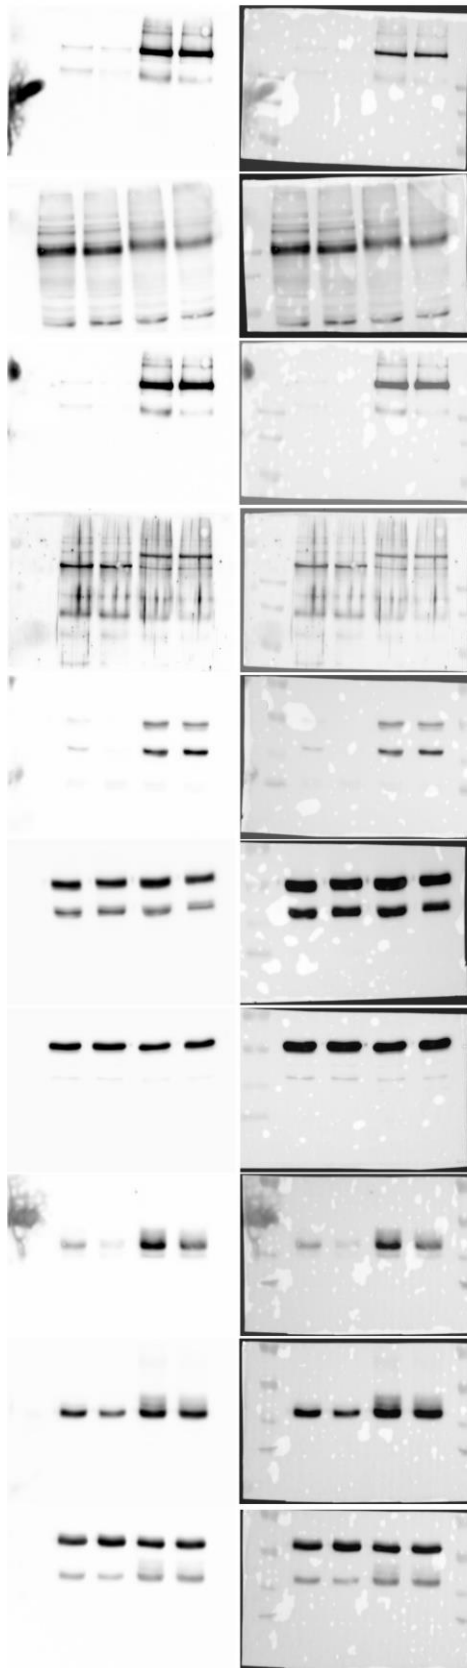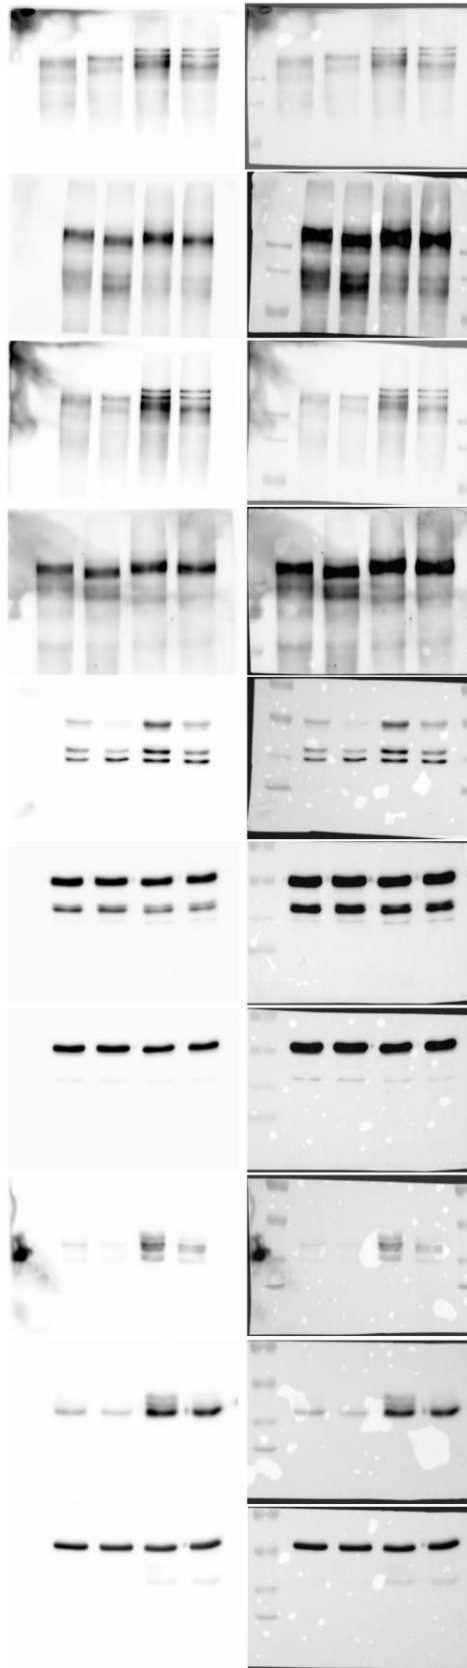

IB: p-IRS1/2<sup>Ser636/639</sup>  
(180 kDa)

IB: IRS1  
(180 kDa)

IB: p-IRS1/2<sup>Ser636/639</sup>  
(180 kDa)

IB: IRS2  
(170 kDa)

IB: p-SAPK/JNK<sup>Thr183/185</sup>  
(46/54 kDa)

IB: SAPK/JNK  
(46/54 kDa)

IB: α-tubulin  
(55 kDa)

IB: p-c-JUN<sup>Ser63/73</sup>  
(48 kDa)

IB: c-JUN  
(43/48 kDa)

IB: α-tubulin  
(55 kDa)

**Supplementary Figure 1. Whole gel images from Western blot analysis.**

Western blot analysis in cell extracts from H1299 and H460 cells under experimental conditions (see Figure 4). Membranes were reprobed with the antibody for the detection of the respective total protein or  $\alpha$ -tubulin, and developed with the SuperSignal™ West Dura Extended Duration Substrate system using a G:BOX Chemi XX6 gel doc imaging system.

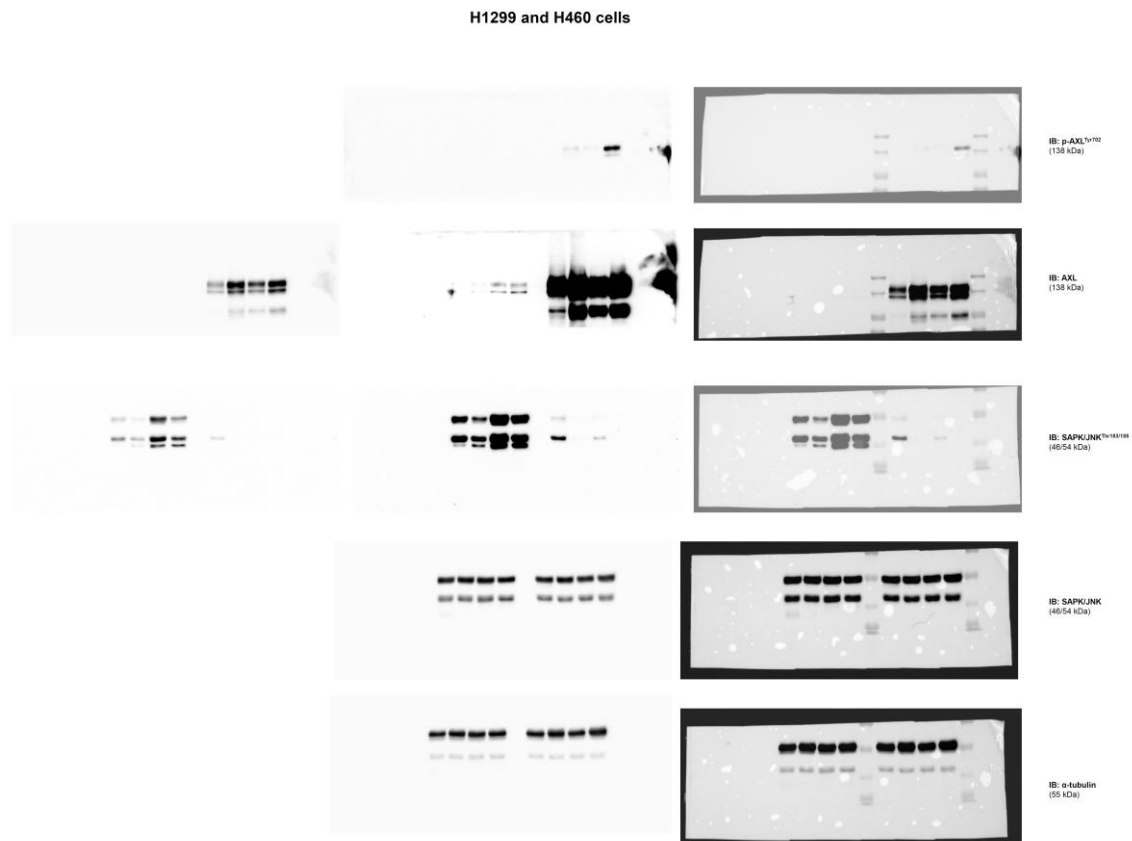

**Supplementary Figure 2. Whole gel images from Western blot analysis.**

Western blot analysis in cell extracts from H1299 and H460 cells under experimental conditions (see Figure 6). Membranes were reprobed with the antibody for the detection of the respective total protein or  $\alpha$ -tubulin, and developed with the SuperSignal™ West Dura Extended Duration Substrate system using a G:BOX Chemi XX6 gel doc imaging system.

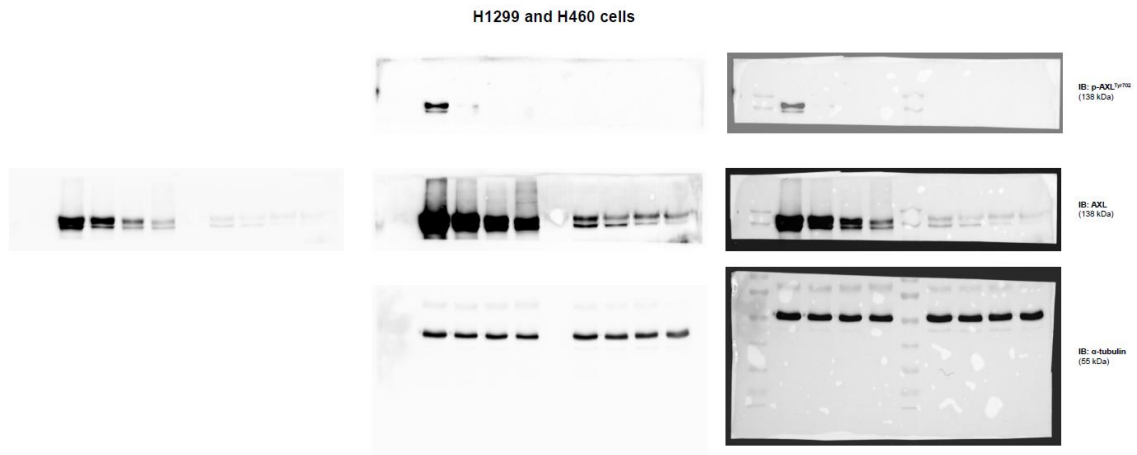

**Supplementary Figure 3. Whole gel images from Western blot analysis.**

Western blot analysis in cell extracts from H1299 and H460 cells under experimental conditions (see Supplementary Figure 5). Membranes were reprobbed with the antibody for the detection of the respective total protein or  $\alpha$ -tubulin, and developed with the SuperSignal™ West Dura Extended Duration Substrate system using a G:BOX Chemi XX6 gel doc imaging system.



H1975 cells

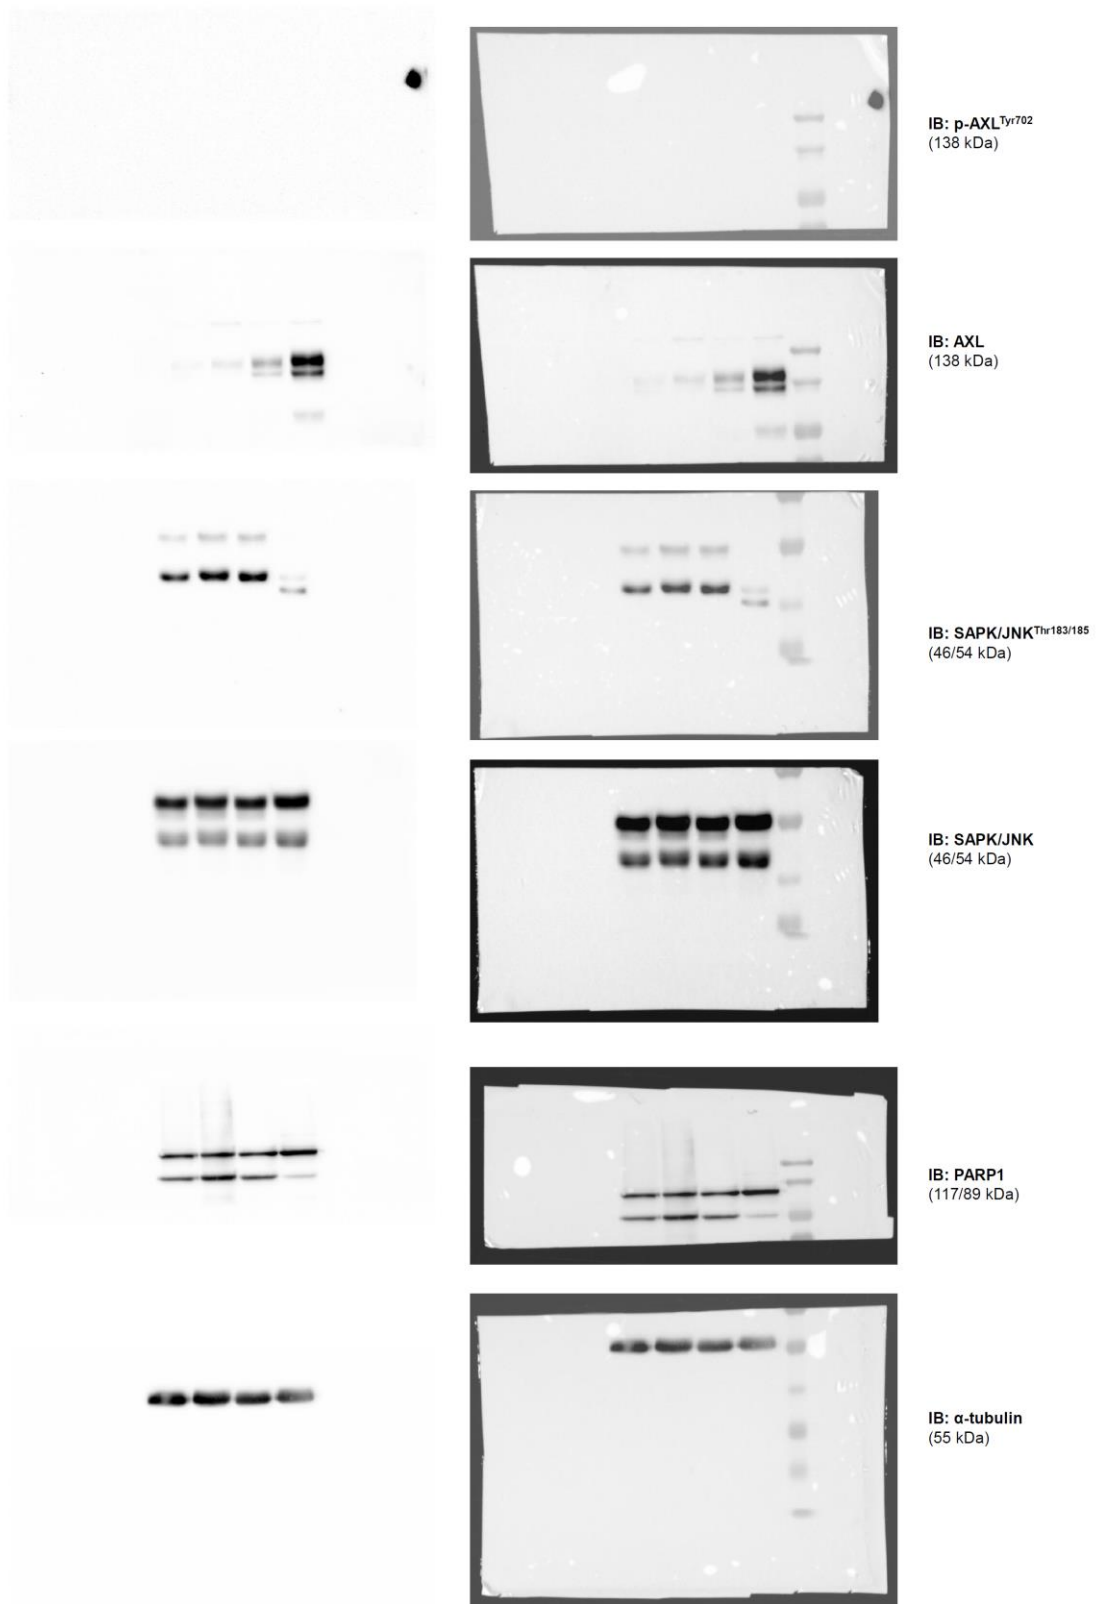

**Supplementary Figure 4. Whole gel images from Western blot analysis.** Western blot analysis in cell extracts from H1299 and H460 cells under

experimental conditions (see Supplementary Figure 6). Membranes were reprobed with the antibody for the detection of the respective total protein or  $\alpha$ -tubulin, and developed with the SuperSignal™ West Dura Extended Duration Substrate system using a G:BOX Chemi XX6 gel doc imaging system.

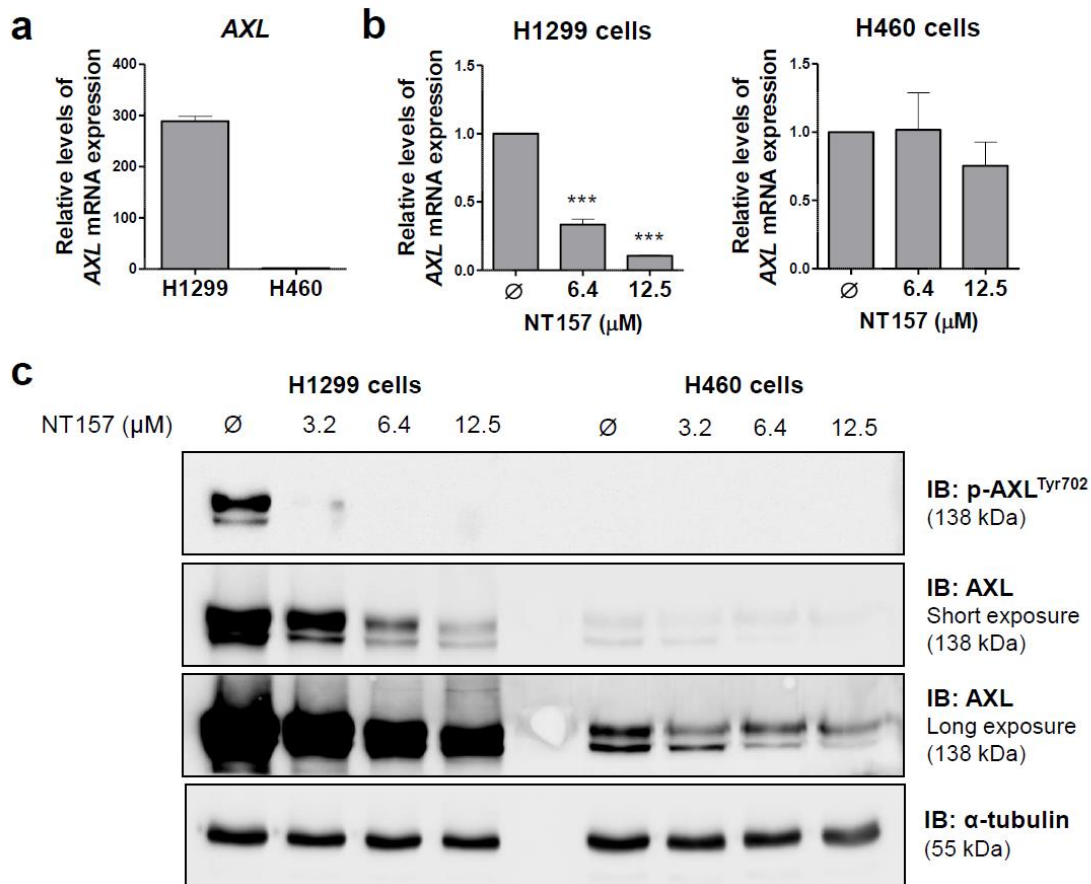

**Supplementary Figure 5. Downregulation of AXL induced by NT157 occurs at the mRNA level in lung cancer cells.** AXL mRNA levels were evaluated by qPCR in H1299 *versus* H460 cells (**a**) or cells treated with vehicle or NT157 (3.2, 6.4, and 12.5  $\mu$ M) (**b**). The bar graph represents the mean  $\pm$  SD of at least three independent experiments. \*\*\* $p$  < 0.001, ANOVA and Bonferroni post-test. (**c**) Western blot analysis for p-AXL<sup>Tyr702</sup> and AXL in total cell extracts from H1299 and H460 cells treated with vehicle or NT157 (3.2, 6.4, and 12.5  $\mu$ M) for 24 hours. Membranes were reprobed with an antibody to detect  $\alpha$ -tubulin, and images were then developed with a SuperSignal™ West Dura Extended Duration Substrate system using a G:BOX Chemi XX6 gel doc imaging system.

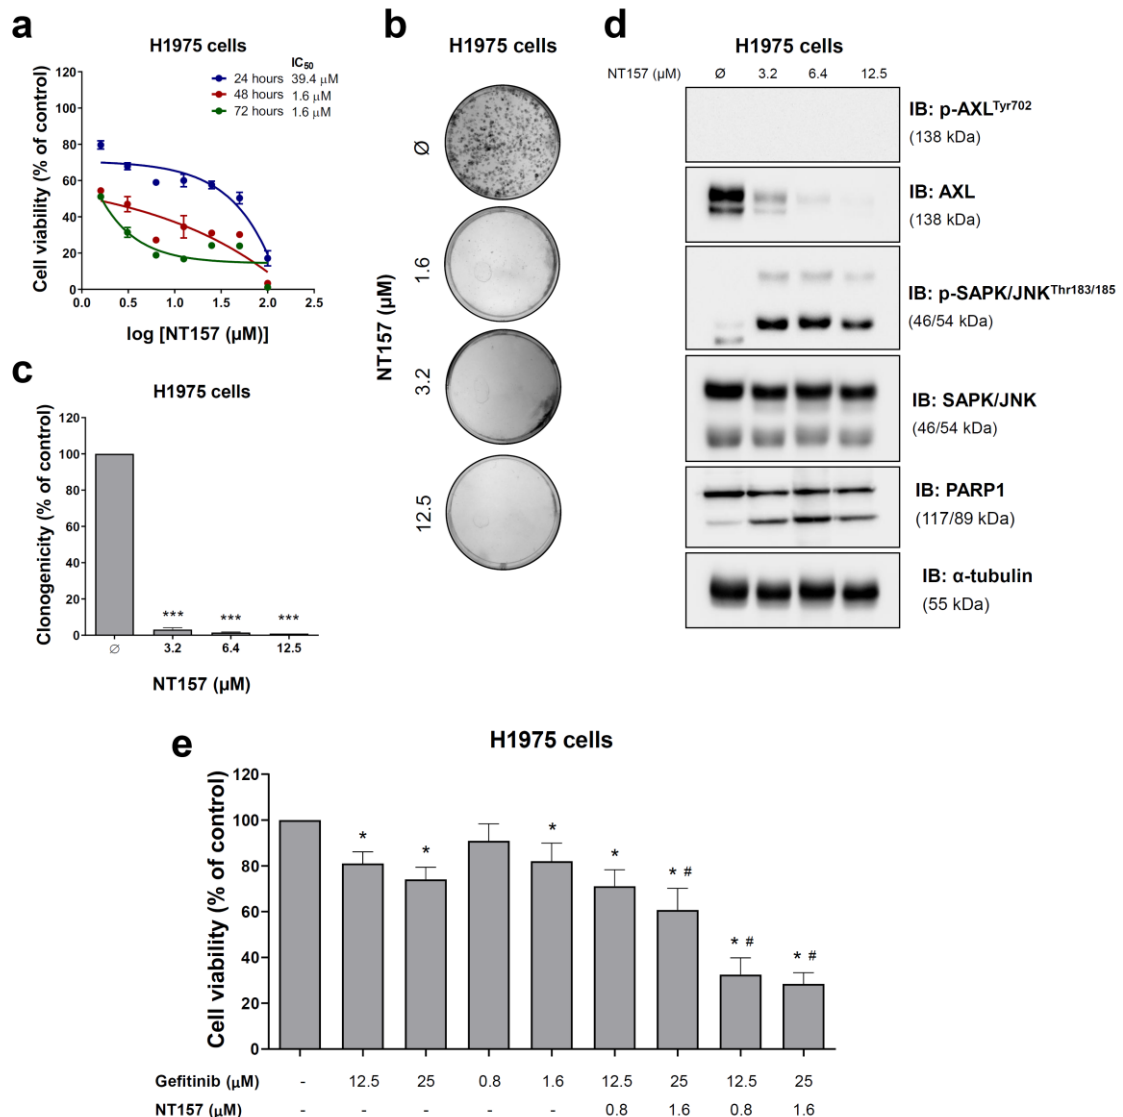

**Supplementary Figure 6. NT157 displays antineoplastic activity in H1975, an EGFR-mutated cell line. (a)** Dose- and time-response cytotoxicity was evaluated by the sulforhodamine B (SRB) assay. H1975 cells were treated with vehicle ( $\emptyset$ ) or different concentrations of NT157 (1.6, 3.2, 6.4, 12.5, 25, 50, and 100  $\mu$ M) for 24, 48, and 72 h. Values are expressed as the percentage of viable cells for each condition relative to vehicle-treated cells. Results are shown as mean  $\pm$  SD of at least 3 independent experiments. **(b)** Colony formation of the cells treated with vehicle or NT157 (1.6, 3.2, 6.4, and 12.5  $\mu$ M) and for 7 days. The bar graph represents the mean  $\pm$  SD of the relative number of colonies (% of control). \*\*\* $p$  < 0.001; ANOVA and Bonferroni post-test. **(c)** Western blot analysis for p-AXL<sup>Tyr702</sup>, AXL, p-SAPK/JNK<sup>Thr183/185</sup>, SAPK/JNK, and PARP1 in total cell extracts from H1975 cells treated with vehicle or NT157 (3.2, 6.4, and 12.5  $\mu$ M) for 24 hours. **(d)** H1974 cells treated with NT157 (0.8 and 1.6  $\mu$ M) and

gefitinib (12.5 and 25  $\mu$ M) alone or in combination with each other for 48 hours, as indicated. Values are expressed as the percentage of viable cells for each condition relative to vehicle-treated cells. Results are shown as mean  $\pm$  SD of at least 3 independent experiments. The  $p$  values are indicated in the graphs; \* $p$  < 0.05 for gefitinib- and/or NT157-treated cells vs. vehicle-treated cells, # $p$  < 0.05 for gefitinib- or NT157-treated cells versus combination treatment at the corresponding doses; ANOVA and Bonferroni post-test.
